# Supplementary material
Source: publisher figshare collection journal article supplement (https://brill.figshare.com/ndownloader/files/23984771)
Supplement: Supplementary file 1 [file 23984771]

## Sheet: Supporting Information
Supporting information for: Increased personality differences in Spring suggest a role in breeding. Soraia Guerra, Ana Cristina R. Gomes, Gonçalo C. Cardoso
Dataset. Behaviours in the mirror and tonic immobility tests, per individual ID, sex and period at which birds were tested.
Individual ID	Sex	Test period	Position relative to the mirror, mirror concealed	Position relative to the mirror, mirror exposed	Proportion of time facing the mirror, mirror concealed	Proportion of time facing the mirror, mirror exposed	Proportion of time in fast movements, mirror concealed	Proportion of time in fast movements, mirror exposed	Proportion of time grooming, mirror concealed	Proportion of time grooming, mirror exposed	Proportion of time resting, mirror concealed	Proportion of time resting, mirror exposed	Vocalizations, mirror concealed	Vocalizations, mirror exposed	Changing locations, mirror concealed	Changing locations, mirror exposed	Behaviour in mirror test (PC1)	Tonic immobility (s)
X08826	M	Autumn 2016, Round 1	3.25418	1.37753	0.714649	0.610435	0	0	0	0	0	0	0	1	3	20	-1.01545	0
X08827	F	Autumn 2016, Round 1	3.41833	4.97151	0.351839	0.899666	0	0.00535117	0	0	0	0	0	0	91	10	-1.26589	123.8
X08829	F	Autumn 2016, Round 1	4	3.98649	0.842943	0.845753	0	0.00989967	0	0	0	0	0	0	0	8	-1.0384	17.6
X08830	M	Autumn 2016, Round 1	4	3.59639	0.697659	0.0401338	0	0.012709	0	0	0	0	0	1	0	5	0.503586	23.2
X08831	F	Autumn 2016, Round 1	4	3.89699	0.817258	0.083612	0	0.0818729	0	0	0	0	0	0	0	136	1.93764	91.9
X08832	M	Autumn 2016, Round 1	4	1.0598	0.985017	0.592241	0	0.00816054	0	0	0	0	0	0	0	4	-0.88632	115.1
X08833	F	Autumn 2016, Round 1	3.0313	3.9905	0.622742	0.262876	0	0	0.00628763	0	0	0	0	0	56	12	-0.860765	4.8
X08834	F	Autumn 2016, Round 1	3.90448	1.04254	0.316656	0.388094	0	0.029699	0	0	0	0	0	0	17	4	-0.0843319	16.6
X08835	M	Autumn 2016, Round 1	3	3.99773	0	0.181806	0	0.00347826	0	0	0	0	0	0	0	1	-0.794365	91.3
X08836	F	Autumn 2016, Round 1	3.09993	3.95438	0.182341	0.0846823	0	0.0179264	0	0	0	0	0	0	67	149	1.40111	8.9
X08837	M	Autumn 2016, Round 1	3.34435	4.24134	0.00187291	0.0222074	0	0.110903	0	0	0	0	26	16	174	194	3.32677	109.2
X08839	F	Autumn 2016, Round 1	4	3.99197	0.886288	0.441338	0	0.0129766	0	0	0	0	0	0	0	48	0.309341	0
X08840	M	Autumn 2016, Round 1	4	2.02836	0.877592	0.983545	0	0.0133779	0	0	0	0	0	0	0	4	-1.36259	0
X08841	M	Autumn 2016, Round 1	3.23518	2.56201	0.24602	0.170033	0	0.00481605	0	0	0	0	9	0	31	6	-0.244635	0
X08843	M	Autumn 2016, Round 1	3.91264	4.21405	0.317191	0.0370569	0	0.199465	0	0	0	0	0	6	36	176	3.16314	101.9
X08844	F	Autumn 2016, Round 1	3	2.03973	0.835585	0.237324	0	0.00602007	0	0	0	0	0	0	0	3	-0.476247	122.1
X08845	M	Autumn 2016, Round 1	2.9889	2.01712	0.131237	0.616589	0	0	0	0	0	0	0	0	2	3	-1.85202	1.8
X08846	F	Autumn 2016, Round 1	2.29806	1.03425	0.32107	0.231839	0	0.0168562	0	0	0	0	0	0	60	3	-0.109416	0
X08847	M	Autumn 2016, Round 1	2.96321	3.73258	0.0498997	0.0255518	0	0.0473579	0	0	0	0	0	10	161	179	2.81076	0
X08848	M	Autumn 2016, Round 1	3	3.01217	0.49097	0.695652	0	0.00160535	0	0	0	0	0	0	4	18	-1.08135	0
X08849	M	Autumn 2016, Round 1	2.74007	2.80214	0.0240803	0.101672	0	0.0161873	0	0	0	0	0	0	68	24	0.720928	40.9
X08850	M	Autumn 2016, Round 1	2.8087	4.02301	0.228361	0.823411	0	0.00508361	0	0	0	0	0	0	122	14	-1.04944	13.5
X08851	F	Autumn 2016, Round 1	2	3.87144	0.162676	0.0678261	0	0.0248829	0	0	0	0	0	0	0	100	1.41325	0
X08852	F	Autumn 2016, Round 1	3.66234	4	0.219532	0.859666	0	0	0	0	0	0	0	0	9	2	-2.35394	110.2
X08854	F	Autumn 2016, Round 1	2.92602	2.19398	0.00802676	0.632776	0	0.0136455	0	0	0	0	9	4	107	8	0.0250714	16.7
X08855	F	Autumn 2016, Round 1	3.96456	2.01568	0.525631	0.794114	0	0.00682274	0	0	0	0	0	0	7	8	-1.07986	38.9
X08856	F	Autumn 2016, Round 1	3.00067	2.0091	0.636789	0.560803	0	0.00735786	0	0	0	0	0	0	4	3	-0.945917	52.8
X08857	F	Autumn 2016, Round 1	3.60468	3.99625	0.417659	0.816802	0.00200669	0.00267559	0	0	0	0	0	0	73	1	-1.92323	107.5
X08859	F	Autumn 2016, Round 1	3.15826	1.06154	0.539933	0.168696	0	0.0161873	0	0	0	0	0	0	4	5	0.119869	57.3
X08860	M	Autumn 2016, Round 1	3.20308	1.04548	0.0881605	0.467425	0	0.0149833	0	0	0	0	0	0	391	7	-0.304667	0
X08826	M	Autumn 2016, Round 2	3.13739	2.00054	0.285084	0.919197	0	0.00441472	0	0	0	0	6	1	38	7	-1.2116	0
X08827	F	Autumn 2016, Round 2	2.97151	2.0792	0.361739	0.0989967	0	0.00602007	0	0	0	0	0	0	40	3	-0.246822	0
X08829	F	Autumn 2016, Round 2	4	3.01365	0.625017	0.117592	0	0.0131104	0	0	0	0	0	0	0	2	-0.108902	0
X08830	M	Autumn 2016, Round 2	3	3	0.211237	0.702341	0	0.00976589	0	0	0	0	0	0	0	0	-1.55954	0
X08831	F	Autumn 2016, Round 2	2.8911	3.99237	0.454448	0.099398	0	0.083612	0	0	0	0	1	0	31	50	1.5802	92.2
X08832	M	Autumn 2016, Round 2	3	2.22007	0.362542	0.0358528	0	0.00762542	0	0	0	0	0	12	6	9	1.20287	31.6
X08833	F	Autumn 2016, Round 2	2.31425	3.99465	0.0153846	0.928562	0	0.0038796	0	0	0	0	3	0	15	2	-1.86083	3.7
X08834	F	Autumn 2016, Round 2	3	3.00722	0.601338	0.00374582	0	0.00789298	0	0	0	0	0	0	0	4	0.0783769	44.7
X08835	M	Autumn 2016, Round 2	3	3.99746	0.215652	0.833177	0	0	0	0	0	0	0	0	0	1	-2.44919	35.7
X08836	F	Autumn 2016, Round 2	3.01137	3.98689	0.213645	0.268763	0	0.00107023	0	0	0	0	0	2	123	124	0.592812	112.2
X08837	M	Autumn 2016, Round 2	3.14194	4.02167	0.376187	0.00668896	0	0.163211	0	0	0	0	40	41	16	85	3.55396	90.1
X08839	F	Autumn 2016, Round 2	3	3.97151	0.0291639	0.572308	0	0.0188629	0	0	0	0	0	0	0	49	0.233732	53.2
X08840	M	Autumn 2016, Round 2	3.85137	4.1109	0.289365	0.0101672	0	0.0658194	0	0	0	0	0	83	17	57	3.32557	110.9
X08841	M	Autumn 2016, Round 2	3	2.28829	0.611773	0.0701003	0	0.00856187	0	0	0	0	0	0	0	11	0.296642	91.2
X08843	M	Autumn 2016, Round 2	3.45472	4.09512	0.236923	0.0167224	0	0.129097	0	0	0	0	0	8	70	156	3.08326	90
X08844	F	Autumn 2016, Round 2	2.76896	1.87518	0.0111037	0.0163211	0	0.00468227	0	0	0	0	0	0	1	11	0.186415	89.9
X08845	M	Autumn 2016, Round 2	2.9699	2.12963	0.143679	0.687625	0	0	0.00441472	0	0	0	0	13	40	5	-0.851657	8.7
X08846	F	Autumn 2016, Round 2	2	4.00656	0.0038796	1	0	0	0	0	0	0	0	0	0	2	-2.58669	0
X08847	M	Autumn 2016, Round 2	2.84067	2.01445	0.278796	0.325753	0	0.0120401	0	0	0	0	0	11	127	5	0.675383	0
X08848	M	Autumn 2016, Round 2	3.00361	2.00963	0.584482	0.716254	0	0	0	0	0	0	0	0	1	10	-1.67007	0
X08849	M	Autumn 2016, Round 2	3.06368	3.99278	0.137659	0.410702	0	0.00602007	0	0	0	0	0	0	33	3	-0.763806	38.9
X08850	M	Autumn 2016, Round 2	3.60388	3.98569	0.215518	0.648562	0	0.00561873	0	0	0	0	0	0	31	35	-0.426611	0
X08851	F	Autumn 2016, Round 2	3.39973	4.18328	0.306355	0.212843	0	0.00923077	0	0	0	0	0	1	75	99	1.07078	21.2
X08852	F	Autumn 2016, Round 2	3	3.99331	0.0626087	0.896187	0	0.0038796	0	0	0	0	0	1	0	3	-1.45125	5.7
X08854	F	Autumn 2016, Round 2	3.33778	3.01995	0.0025418	0.84694	0	0.00777552	0	0	0	0	0	0	1	3	-1.40181	11.6
X08855	F	Autumn 2016, Round 2	3	3	0.284548	0.925619	0	0	0	0	0	0	0	0	0	2	-2.46333	78.4
X08856	F	Autumn 2016, Round 2	3	3	0.556656	0.800268	0	0	0	0	0	0	0	0	0	0	-2.63255	5
X08857	F	Autumn 2016, Round 2	2.72883	3.09886	0.159732	0.897659	0	0.010301	0	0	0	0	0	0	101	1	-1.62695	50.4
X08859	F	Autumn 2016, Round 2	3	3.00682	0.0882943	0.924415	0	0.0111037	0	0	0	0	0	0	0	4	-1.33049	0
X08860	M	Autumn 2016, Round 2	3	2.82515	0.922408	0.00361204	0	0.0143144	0	0	0	0	0	0	0	8	0.488646	0
X08894	M	Autumn 2017, Round 1	3.55278	3.20896	0.647893	0.698328	0	0.0028	0	0	0	0	0	0	29	9	-1.1615	78.3
X08895	M	Autumn 2017, Round 1	2.68174	3.70542	0.325084	0.109833	0	0.0314667	0	0	0	0	2	0	142	184	1.63818	16.6
X08896	M	Autumn 2017, Round 1	3	2.94662	0.0361204	0.733378	0	0	0	0	0	0	0	0	0	26	-1.39022	57
X08897	M	Autumn 2017, Round 1	3.1501	3.00134	0.353043	0.89097	0.0016	0.00613333	0	0	0	0	0	0	49	8	-1.27585	0
X08898	F	Autumn 2017, Round 1	3.80535	2.99973	0.711839	0.640669	0	0.00293333	0	0	0	0	0	0	5	16	-0.870499	14.8
X08899	M	Autumn 2017, Round 1	4	4.00455	0.753846	0.111171	0	0.0330667	0	0	0	0	0	7	1	66	2.07714	75.5
X08900	F	Autumn 2017, Round 1	2.80201	4.03037	0.10087	0.131639	0.0016	0.0186667	0	0	0	0	2	14	16	75	2.10913	23.5
X53101	F	Autumn 2017, Round 1	2	3.99117	0.161204	0.847625	0	0.0032	0	0	0	0	0	0	0	5	-1.54612	73.3
X53102	F	Autumn 2017, Round 1	1	3.11839	0	0.461003	0	0.004	0	0	0	0	0	0	0	59	-0.0476492	0
X53103	F	Autumn 2017, Round 1	2.57017	4.10167	0.521873	0.655117	0	0.0105333	0	0	0	0	16	0	135	22	-0.378482	6.9
X53104	M	Autumn 2017, Round 1	2.96856	3.99157	0.428629	0.892709	0.0044	0.00493333	0	0	0	0	2	0	46	3	-1.62769	25.6
X53105	M	Autumn 2017, Round 1	3.42903	3.84575	0.332308	0.425686	0.00613333	0.0881333	0	0	0	0	70	1	106	164	1.71917	106.6
X53106	M	Autumn 2017, Round 1	3	2.24696	0.351304	0.317592	0	0	0.0056	0.00426667	0	0	0	0	0	5	-1.21693	0
X53107	F	Autumn 2017, Round 1	3	1.47438	0.58796	0.202809	0	0.0694667	0.0105333	0	0	0	0	0	0	25	1.10731	0
X53108	F	Autumn 2017, Round 1	2	2.99799	0.0381271	0.714649	0	0	0	0	0	0	4	0	0	6	-1.82256	38.8
X53109	F	Autumn 2017, Round 1	2.17124	3.99411	0.061806	0.937793	0	0	0	0	0	0	1	0	7	13	-1.95472	5.3
X53110	F	Autumn 2017, Round 1	4	3.90301	0.842676	0.702207	0	0.0172	0	0	0	0	0	0	0	26	-0.22674	72.5
X53111	M	Autumn 2017, Round 1	3.10154	2.0503	0.381003	0.041204	0	0.0125333	0	0	0	0	0	0	178	7	0.33849	10.1
X53112	M	Autumn 2017, Round 1	3.59759	4.24054	0.25311	0.172651	0.00213333	0.076	0	0	0	0	0	0	156	209	1.90842	0
X53113	M	Autumn 2017, Round 1	4	3.86087	0.794649	0.293645	0	0.131733	0	0	0	0	0	99	0	193	3.59756	0
X53114	M	Autumn 2017, Round 1	3	2.01458	0.729231	0.663278	0	0	0	0	0	0	0	0	0	7	-1.69152	0
X53115	M	Autumn 2017, Round 1	2.84201	3.70609	0.397191	0.189431	0	0.0372	0	0	0	0	5	3	109	205	2.11965	6
X53116	M	Autumn 2017, Round 1	3.01645	3.80963	0.745284	0.216722	0	0.0832	0	0	0	0	0	6	16	211	2.5947	46.7
X53117	F	Autumn 2017, Round 1	3.02916	2.08094	0.382074	0.54194	0	0.0109333	0	0	0	0	62	0	145	5	-0.638979	2.5
X53118	F	Autumn 2017, Round 1	3	3.00241	0.00816054	0.5901	0	0	0	0	0	0	0	0	1	2	-1.90685	74.8
X53119	F	Autumn 2017, Round 1	2	2.01231	0.568027	0.974181	0	0.00626667	0	0	0	0	0	0	0	7	-1.4472	33.5
X53120	F	Autumn 2017, Round 1	2.76522	3.74555	0.289498	0.456722	0	0.0052	0	0	0	0	0	0	1	42	-0.0724821	85.9
X53121	F	Autumn 2017, Round 1	3.06194	2.05686	0.405351	0.608161	0	0.00186667	0	0.00186667	0	0	3	0	75	13	-1.00445	16
X53122	F	Autumn 2017, Round 1	2	4.06274	0.0292977	0.340067	0	0.0353333	0	0	0	0	0	0	0	212	1.34782	69.3
X53123	F	Autumn 2017, Round 1	4	3.87398	0.0460201	0.783278	0	0.0158667	0	0	0	0	0	9	0	4	-0.115076	0
X08894	M	Autumn 2017, Round 2	3.58662	4	0.832508	0.723612	0	0.00693333	0	0	0	0	0	0	7	2	-1.33468	0
X08895	M	Autumn 2017, Round 2	3.44495	3.98957	0.452709	0.229431	0	0.0262667	0	0	0	0	0	0	2	224	1.44013	89.3
X08896	M	Autumn 2017, Round 2	3.14234	3.96495	0.842542	0.81806	0	0.01	0	0	0	0	0	0	2	15	-0.791453	81.5
X08897	M	Autumn 2017, Round 2	3	2.29084	0.552776	0.514515	0	0.0096	0	0	0	0	0	0	2	18	-0.243206	9.2
X08898	F	Autumn 2017, Round 2	3	3.98569	0.012709	0.539666	0	0.0092	0	0	0	0	0	0	0	27	-0.166548	26.1
X08899	M	Autumn 2017, Round 2	3.94662	4.06274	0.643344	0.237726	0	0.0068	0	0	0	0	0	0	14	102	0.67857	80.9
X08900	F	Autumn 2017, Round 2	3.0606	3.08656	0.133779	0.911572	0	0.00426667	0	0	0	0	5	1	4	7	-1.20957	14.4
X53101	F	Autumn 2017, Round 2	3	3.03906	0.659933	0.995318	0	0.00293333	0	0	0	0	0	0	0	4	-1.8788	70.4
X53102	F	Autumn 2017, Round 2	4	2.19157	0.841204	0.830234	0	0.00413333	0	0	0	0	0	6	2	20	-0.288472	0
X53103	F	Autumn 2017, Round 2	3.0301	4.09231	0.356789	0.26903	0	0.0373333	0	0	0	0	0	8	58	159	2.20305	0
X53104	M	Autumn 2017, Round 2	2.73632	3.00268	0.314381	0.808829	0	0.0028	0	0	0	0	0	0	39	4	-1.58271	6.3
X53105	M	Autumn 2017, Round 2	3.30582	4.06823	0.52	0.320268	0	0.105333	0	0	0	0	19	3	71	254	2.36819	69.3
X53106	M	Autumn 2017, Round 2	3	1.99371	0.698729	0.667023	0	0.00706667	0	0	0	0	0	0	0	5	-0.996493	0
X53107	F	Autumn 2017, Round 2	3	3.05498	0.372575	0.647759	0	0.0109333	0	0	0	0	0	0	0	24	-0.324591	0
X53108	F	Autumn 2017, Round 2	2.15157	3.00375	0.246957	0.100736	0	0	0	0	0	0	0	0	1	10	-0.649191	1.7
X53109	F	Autumn 2017, Round 2	3	3.99625	0.273445	0.65806	0	0	0	0	0	0	0	0	0	3	-1.92081	67.2
X53110	F	Autumn 2017, Round 2	2.86314	3.92642	0.454983	0.531639	0	0.0112	0.0012	0	0	0	0	0	5	37	0.0202045	24.8
X53111	M	Autumn 2017, Round 2	3.11706	2.93365	0.480669	0.645753	0	0.0052	0.00173333	0.00266667	0	0	0	0	76	9	-0.88671	0
X53112	M	Autumn 2017, Round 2	3.33565	4.25391	0.424482	0.149833	0	0.1084	0	0	0	0	2	1	110	265	2.41912	3.2
X53113	M	Autumn 2017, Round 2	3	3.97739	0.293645	0.200134	0	0.11	0	0	0	0	0	53	2	175	3.42212	0
X53114	M	Autumn 2017, Round 2	3	2.01284	0.71398	0.679599	0	0.00173333	0	0	0	0	0	0	0	5	-1.43204	0
X53115	M	Autumn 2017, Round 2	3.27064	3.94662	0.559197	0.168696	0	0.0036	0	0	0	0	8	45	12	65	1.85822	0
X53116	M	Autumn 2017, Round 2	3	3.67679	0.757726	0.391171	0	0.0322667	0	0	0	0	0	67	2	176	2.73101	19.1
X53117	F	Autumn 2017, Round 2	3.30274	3.35318	0.631973	0.803344	0	0.00666667	0	0	0	0	0	0	53	4	-1.30466	4.4
X53118	F	Autumn 2017, Round 2	3.0305	3	0.256856	0.709967	0	0.00813333	0	0	0	0	0	0	92	2	-1.25807	14.8
X53119	F	Autumn 2017, Round 2	2	2.01164	0	0.879197	0	0.0084	0	0	0	0	0	1	0	4	-1.09523	73.3
X53120	F	Autumn 2017, Round 2	2.9901	3.91933	0.427425	0.299169	0.0012	0.00453333	0	0.0048	0	0	0	0	18	150	0.576422	0
X53121	F	Autumn 2017, Round 2	3.0396	2.05043	0.335652	0.449498	0	0.00826667	0	0	0	0	0	0	110	3	-0.721759	1.9
X53122	F	Autumn 2017, Round 2	2.81632	4.01472	0.376321	0.498326	0	0.0296	0	0	0	0	0	0	11	45	0.493406	0
X53123	F	Autumn 2017, Round 2	3.06074	2.96348	0.351171	0.507826	0	0.00826667	0	0	0	0	0	1	12	8	-0.282991	0
X08827	F	Autumn 2017, recapture	3	3.92495	0.476789	0.208829	0	0.1132	0	0	0	0	0	7	0	131	2.61146	19
X08830	M	Autumn 2017, recapture	4	3.00843	0.0548495	0.555719	0	0.00773333	0.0117333	0	0	0	0	0	0	2	-1.0194	3
X08831	F	Autumn 2017, recapture	3.03545	3.9893	0.0782609	0.208428	0	0.0702667	0	0	0	0	0	0	14	149	1.70393	27.8
X08832	M	Autumn 2017, recapture	3	2.0293	0.746087	0.759732	0	0.00506667	0.193067	0.996667	0	0	0	13	0	3	-0.419626	69.2
X08833	F	Autumn 2017, recapture	3.80468	3.00963	0.291773	0.689632	0	0.00773333	0.00333333	0	0	0	0	0	42	3	-1.14275	2.2
X08835	M	Autumn 2017, recapture	3	3.0606	0.561338	0.363478	0	0.0032	0	0	0	0	23	8	0	4	0.00937479	1.1
X08836	F	Autumn 2017, recapture	3.35532	3.00602	0.344348	0.67291	0	0.00546667	0	0	0	0	0	0	76	1	-1.4681	18.8
X08839	F	Autumn 2017, recapture	3.14569	4.1513	0.312642	0.185686	0.00346667	0.0114667	0	0	0	0	0	0	141	167	1.11251	69.9
X08840	M	Autumn 2017, recapture	3.76522	4.12896	0.568161	0.0870903	0	0.0674667	0	0	0	0	0	26	30	185	3.1863	73.1
X08843	M	Autumn 2017, recapture	3.09833	4.32241	0.283344	0.145819	0.0116	0.0909333	0	0	0	0	0	0	105	175	1.96021	30.6
X08844	F	Autumn 2017, recapture	2.96923	1.16094	0.457258	0.868094	0	0	0	0	0	0	0	0	24	10	-1.9219	9
X08845	M	Autumn 2017, recapture	2	2.00829	0.553445	0.512375	0	0.0036	0.0281333	0	0	0	0	0	0	6	-0.902311	0
X08846	F	Autumn 2017, recapture	3.30114	2.09672	0.175251	0.037592	0	0.00586667	0	0	0	0	0	0	321	10	0.193815	0
X08848	M	Autumn 2017, recapture	2.84013	2.00923	0.369231	0.732709	0	0.00266667	0	0	0	0	33	0	1	6	-1.35465	0
X08849	M	Autumn 2017, recapture	2.9711	3.8895	0.105552	0.0675585	0	0.00373333	0	0	0	0	0	2	60	60	0.997123	67.7
X08850	M	Autumn 2017, recapture	3.22796	3.95278	0.34689	0.381806	0	0.00306667	0	0.0032	0	0	0	0	163	65	0.0372505	0
X08851	F	Autumn 2017, recapture	3.84669	3.05084	0.18903	0.62903	0	0.00133333	0	0	0	0	0	0	100	28	-0.867953	16.5
X08852	F	Autumn 2017, recapture	2	2	0.0202007	0.740201	0	0.00653333	0	0	0	0	0	0	0	0	-1.75914	12.6
X08854	F	Autumn 2017, recapture	3.12736	2.0111	0.410033	0.69592	0.00186667	0.00613333	0	0	0	0	33	1	79	3	-0.973589	25.3
X08855	F	Autumn 2017, recapture	2.89672	2.98849	0.291505	0.0393311	0.0044	0.0109333	0	0	0	0	0	0	259	2	-0.0433132	10.2
X08856	F	Autumn 2017, recapture	2.99585	2.00843	0.56214	0.438662	0	0	0	0	0	0	0	0	8	9	-1.24238	38
X08857	F	Autumn 2017, recapture	3	3	0.473311	0.422341	0	0	0	0	0	0	0	0	0	4	-1.45325	35.5
X08859	F	Autumn 2017, recapture	2.78783	2.00722	0.410033	0.27505	0	0.00826667	0	0	0	0	0	0	33	3	-0.432426	2.3
X08826	M	Spring 2018, recapture	3	3.0186	0.450301	0.659264	0	0.0064	0	0	0	0	0	0	0	2	-1.25462	2.4
X08827	F	Spring 2018, recapture	3	3.82221	0.418328	0.228094	0	0.0736	0	0	0	0	0	0	0	246	1.86004	27
X08830	M	Spring 2018, recapture	3	4.02381	0.629298	0.246421	0	0.00133333	0	0	0	0	0	0	0	17	-0.39709	6.5
X08832	M	Spring 2018, recapture	2.95157	3.62328	0.510234	0.299933	0	0.0109333	0	0	0	0	0	17	12	73	1.69705	64.1
X08834	F	Spring 2018, recapture	3	3	0.680803	0.47398	0	0.0064	0	0	0	0	0	0	0	0	-1.32444	65.8
X08835	M	Spring 2018, recapture	3	4.09793	0.0608696	0.637726	0	0	0	0	0	0	2	0	0	5	-1.74789	7.5
X08836	F	Spring 2018, recapture	4	4	0.876923	0.776455	0	0	0	0	0	0	0	0	0	2	-2.21593	0
X08839	F	Spring 2018, recapture	3.98314	3.10983	0.782609	0.216589	0	0.0261333	0	0	0	0	0	0	2	130	1.27387	2.92
X08840	M	Spring 2018, recapture	2.73472	4.08468	0.181271	0.115853	0	0.0685333	0	0	0	0	3	70	66	220	3.56237	2.7
X08843	M	Spring 2018, recapture	3.2388	4.059	0.289365	0.228227	0	0.0793333	0	0	0	0	0	5	72	241	2.54585	21.7
X08844	F	Spring 2018, recapture	3.05993	2.7501	0.614181	0.150903	0	0.0169333	0	0	0	0	0	0	51	16	0.523169	2.76
X08845	M	Spring 2018, recapture	3	3.99331	0.657926	0.610836	0	0.0036	0	0	0	0	0	0	0	1	-1.49566	0
X08846	F	Spring 2018, recapture	2.57097	2.75318	0.230368	0.324147	0	0.0504	0	0	0	0	0	2	144	206	1.90489	0
X08848	M	Spring 2018, recapture	3	3.08522	0.782074	0.506087	0	0.0138667	0	0	0	0	0	0	0	91	0.441861	2.65
X08849	M	Spring 2018, recapture	3.09846	3.48482	0.214716	0.0992642	0	0.0164	0	0	0	0	0	2	147	76	1.52335	61.3
X08850	M	Spring 2018, recapture	3.19987	3.99799	0.408428	0.642542	0.00133333	0.004	0.0217333	0.0213333	0	0	0	0	94	7	-1.04041	11.9
X08851	F	Spring 2018, recapture	3.15786	3.37672	0.266622	0.308361	0	0	0	0	0	0	0	0	83	63	-0.389043	0
X08852	F	Spring 2018, recapture	3	2.00963	0.050301	0.56495	0	0	0	0.0016	0	0	0	0	0	9	-1.45184	0
X08854	F	Spring 2018, recapture	2.98622	3.27077	0.669298	0.095786	0	0.0257333	0	0	0	0	5	14	1	94	2.36283	17.1
X08855	F	Spring 2018, recapture	4	2.01378	0.527224	0.631171	0	0	0	0	0	0	0	0	0	10	-1.52895	12.05
X08856	F	Spring 2018, recapture	3	4.98341	0.145552	0.597823	0	0.0028	0	0	0	0	0	0	0	5	-1.17016	78.4
X08859	F	Spring 2018, recapture	3	3.09645	0.483478	0.539398	0	0.00453333	0	0	0	0	0	0	0	4	-0.991847	5.1
X08860	M	Spring 2018, recapture	3	3.00468	0.798261	0.698595	0	0	0	0	0	0	0	0	0	8	-1.70966	1.02
X08894	M	Spring 2018, recapture	3	3.99505	0.718662	0.349565	0	0.00826667	0	0	0	0	0	3	0	115	1.11417	8.2
X08898	F	Spring 2018, recapture	2.97217	3.36241	0.715318	0.239732	0	0.00346667	0	0	0	0	0	0	2	31	0.0603336	9.6
X53101	F	Spring 2018, recapture	3.60227	3.99398	0.715184	0.0999331	0	0.00346667	0	0	0	0	0	0	3	2	-0.52038	48.91
X53105	M	Spring 2018, recapture	3.20241	3.94716	0.421405	0.251505	0	0.0294667	0	0	0	0	5	26	135	149	2.52949	17.1
X53106	M	Spring 2018, recapture	3.71104	1.059	0.755585	0.897793	0	0.00493333	0	0	0	0	0	0	1	7	-1.39818	23.3
X53108	F	Spring 2018, recapture	4	1.02756	0.709565	0.665953	0	0	0	0	0	0	0	0	0	4	-1.8573	2.8
X53111	M	Spring 2018, recapture	4	3.97739	0.793445	0.287759	0	0.00813333	0	0	0	0	0	29	0	166	2.08368	27.8
X53113	M	Spring 2018, recapture	4	3.77779	0.0584615	0.161472	0	0.0609333	0	0	0	0	0	90	0	172	3.45036	3.8
X53115	M	Spring 2018, recapture	3.75893	2.85552	0.474381	0.136029	0	0.0258667	0	0	0	0	5	34	42	125	2.70925	0
X53116	M	Spring 2018, recapture	2.01043	4.10943	0.00280936	0.257208	0	0.116	0	0	0	0	0	36	3	265	3.34916	76.4
X53117	F	Spring 2018, recapture	3.05538	1.08214	0.834381	0.38689	0	0.0324	0	0	0	0	0	0	1	21	0.458579	3.9
X53122	F	Spring 2018, recapture	4	4.14341	0.690167	0.100468	0	0.0210667	0	0	0	0	0	0	0	180	1.49824	18.6
